# Supplementary material for: Combining Near-Infrared (NIR) Analysis and Modelling as a Fast and Reliable Method to Determine the Authenticity of Agarwood (Aquilaria spp.)
Source: MDPI journal article supplement (doi:10.3390/analytica4020018), 2023-06-07
Supplement: s1 [file s1]

# Electronic supplementary information: Combining near-infrared (NIR) analysis and modelling as a fast and reliable method to determine the authenticity of agarwood (*Aquilaria* spp.)

Esther K. Grosskopf, Monique S. J. Simmonds and Christopher J. Wallis

## Analysis methods

### Microscopic

Wood fragments were softened in boiling water. Thin transverse (TS), tangential longitudinal (TLS) and radial longitudinal sections (RLS) were cut using a microtome blade. The thin sections were mounted in glycerol on glass microscope slides, covered with a cover slip and examined with a light microscope.

### LC-MS

#### Sample preparation

50 mg of each of the commercial and authentic agarwood samples were extracted with 1 mL of pure HPLC grade methanol for 24 hrs in the darkness. After extraction, samples were filtered and placed in 2 mL glass vials for LC-MS analysis.

#### LC-MS parameters

LC-MS analyses were performed on a Vanquish UHPLC system (Thermo Scientific, Waltham, MA, USA) coupled to a 100 Hz photodiode array detector (PDA) and an Orbitrap Fusion Tribrid (Thermo Scientific) high-resolution tandem mass spectrometer. Chromatographic separation of plant extracts (5  $\mu$ L) was performed on a Luna C18 column (150 mm  $\times$  3 mm i.d., 3  $\mu$ m, Phenomenex, Torrance, CA, USA) using a mobile phase gradient of 0:90:10 to 90:0:10 ([MeOH (A): water (C): acetonitrile +1% formic acid (D)]) over 60 min. Then, 90% A was held for 10 min and then returned to initial conditions over 5 min at 30  $^{\circ}$ C (flow rate: 400  $\mu$ L/min). UV detection was recorded between 210 and 550 nm.

Mass spectrometry detection was performed in both positive and negative ionization modes using the full scan and data dependent MS2 and MS3 acquisition modes. Total ion current (TIC) chromatograms were obtained over the range of 125–1800 m/z using a spray voltage of +3.5 and –2.5 kV for the positive and negative ionization modes, respectively. Four different scan events were recorded for each ionization mode as follows: (1) full scan, (2) MS2 of the most intense ion in Scan Event 1, (3) MS3 of the most intense ion in Scan Event 2, and (4) MS3 of the second most intense ion in Scan Event 2. Additional parameters for the mass spectrometer included full scan resolution, 60,000 FWHM; capillary temperature, 350  $^{\circ}$ C; ion transfer tube temperature, 325  $^{\circ}$ C; RF lens (%), 50; automatic gain control (AGC) target,  $4.0 \times 10^5$  (full scan) and  $1.0 \times 10^4$  (MSn); intensity threshold,  $1.0 \times 10^4$ ; CID collision energy, 35 eV; activation Q, 0.25; isolation window (m/z), 4. Nitrogen was used as the drying, nebulizer, and fragmentation gas.

The identification of compounds was performed by comparing the monoisotopic mass and MS2 spectra of the experimental data with data from our in-house library of MS2 spectra (Nist) and data reported in the literature for Agarwood.

### Software parameters

Data pre-processing: noise weighting filter, MSC normalisation

Algorithm: SIMCA

Score expansion: 1.5

Residual expansion: 0.72

Factors: maximum 100, minimum 0

RT: 0.00 - 35.03

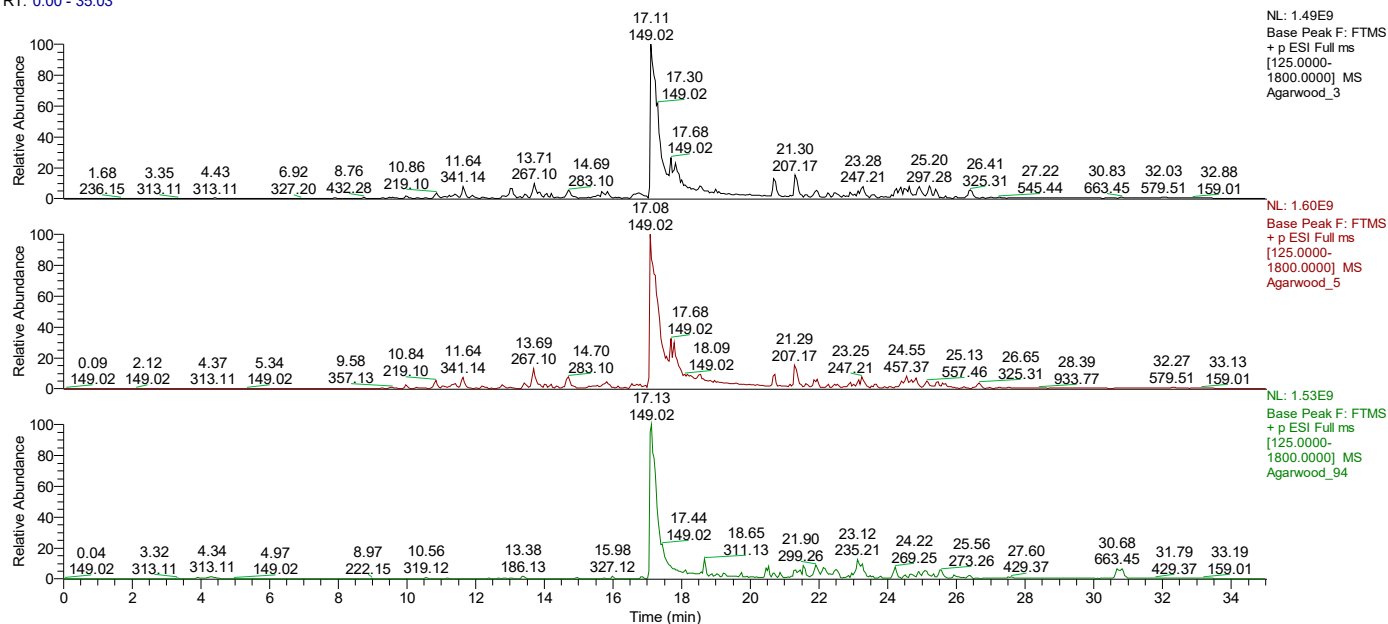

Fig. S1 Positive mode LC-MS chromatograms of three representative agarwood samples

RT: 0.00 - 35.03

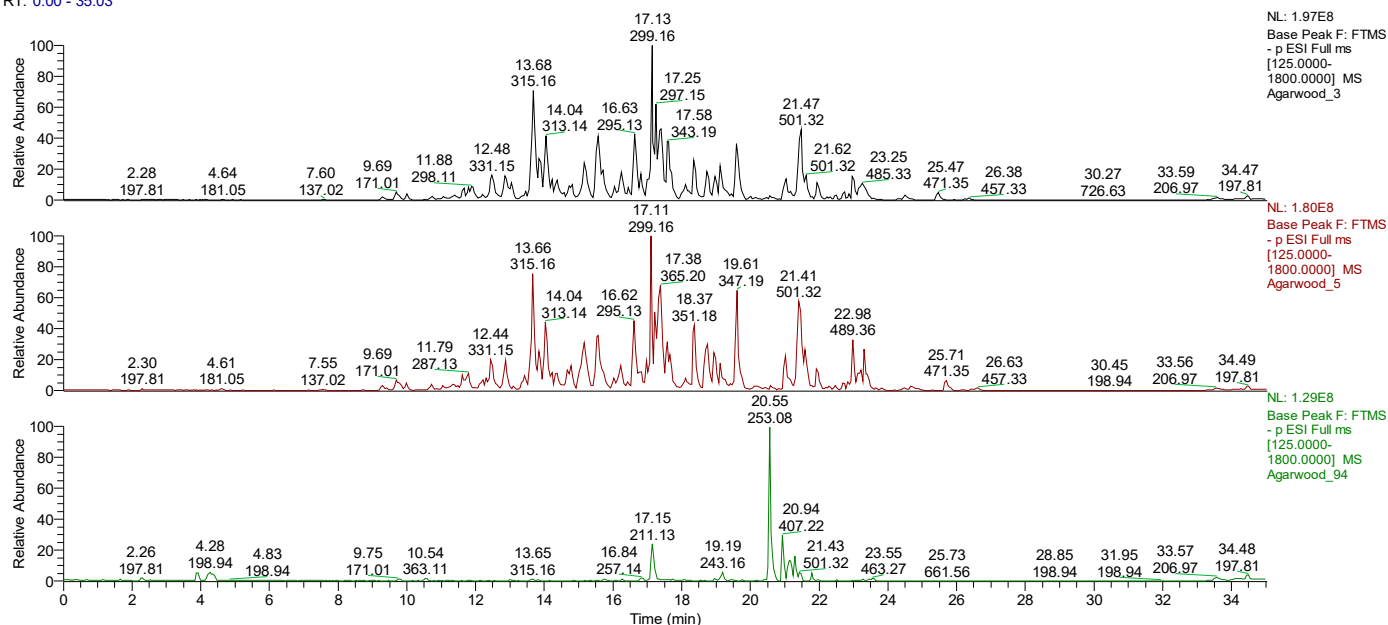

Fig. S2 Negative mode LC-MS chromatograms of three representative agarwood samples

Table S1 Samples included in study

| Number | Format                     | Morphological       | Chemical    | Other notes               |
|--------|----------------------------|---------------------|-------------|---------------------------|
| 1      | crumbs                     | Not agarwood        |             | not identified            |
| 2      | crumbs                     | Not agarwood        |             | not identified            |
| 3      | powder                     | <i>No structure</i> | Substituted |                           |
| 4      | chips                      | Authentic           |             |                           |
| 5      | powder                     | <i>No structure</i> | Substituted |                           |
| 6      | chips                      | Authentic           |             |                           |
| 13     | chips                      | Not agarwood        |             | Eucalyptus                |
| 7      | chips                      | Authentic           |             |                           |
| 8      | small flakes               | Authentic           |             |                           |
| 9      | small flakes + powder      | Not agarwood        |             | Lauraceae                 |
| 10     | chips + resinous powder    | Authentic           |             |                           |
| 11     | chips + resinous powder    | Authentic           |             |                           |
| 12     | flakes + resinous powder   | Authentic           |             |                           |
| 14     | chips                      | Authentic           |             |                           |
| 15     | chips                      | Authentic           |             |                           |
| 16     | chips                      | Authentic           |             |                           |
| 17     | chips                      | Authentic           |             |                           |
| 18     | chips                      | Authentic           |             |                           |
| 19     | chips + resinous powder    | Authentic           |             |                           |
| 20     | chips + resinous powder    | Authentic           |             |                           |
| 21     | chips + resinous powder    | Authentic           |             |                           |
| 22     | chips                      | Not agarwood        |             | not identified            |
| 23     | chips                      | Not agarwood        |             | not identified            |
| 24     | large piece                | Not agarwood        |             | not identified            |
| 25     | chips + resinous powder    | Authentic           |             |                           |
| 26     | chips + resinous powder    | Authentic           |             |                           |
| 27     | chips                      | Authentic           |             |                           |
| 28     | chips                      | Authentic           |             |                           |
| 29     | chips                      | Authentic           |             |                           |
| 30     | chips                      | Authentic           |             |                           |
| 31     | resin chunks + wood flakes | Authentic           |             |                           |
| 32     | flakes                     | Authentic           |             |                           |
| 33     | chips                      | Authentic           |             |                           |
| 34     | resin crumbs + wood flakes | Authentic           |             |                           |
| 35     | chips                      | Authentic           |             |                           |
| 36     | chips (a) chips (b)        | Authentic           |             |                           |
| 37     | chips                      | Authentic           |             |                           |
| 38     | powdery chunks             | Not agarwood        |             | corms, possibly Iridaceae |
| 39     | powder                     | Not agarwood        |             | Daniella                  |
| 40     | <i>resinous chunks</i>     | <i>Not agarwood</i> |             | <i>no plant material</i>  |
| 41     | bright yellow resin chunk  | Not agarwood        |             | possibly Picea            |
| 42     | small flakes               | Not agarwood        |             | Pineus                    |
| 43     | small resinous chunks      | Not agarwood        |             | corms, possibly Iridaceae |
| 44     | oily powder                | Not agarwood        |             | Daniella                  |
| 45     | powdery chunks             | Not agarwood        |             | corms, possibly Iridaceae |
| 46     | <i>resinous chunks</i>     | <i>Not agarwood</i> |             | <i>no plant material</i>  |
| 47     | <i>resin</i>               | <i>Not agarwood</i> |             | <i>no plant material</i>  |
| 48     | <i>resinous chunks</i>     | <i>Not agarwood</i> |             | <i>no plant material</i>  |

|    |                            |                          |             |          |
|----|----------------------------|--------------------------|-------------|----------|
| 49 | resin + wood flakes        | Not agarwood             |             | Santalum |
| 50 | oily black chips           | Authentic                |             |          |
| 51 | oily black chips           | Authentic                |             |          |
| 52 | resin + wood flakes        | Not agarwood             |             | Santalum |
| 53 | chips                      | Authentic                |             |          |
| 54 | chips                      | Authentic                |             |          |
| 55 | chips                      | Authentic                |             |          |
| 56 | chips                      | Authentic                |             |          |
| 57 | chips                      | Authentic                |             |          |
| 58 | chips                      | Authentic                |             |          |
| 59 | chips                      |                          | Authentic   |          |
| 60 | chips                      |                          | Authentic   |          |
| 61 | chips                      |                          | Authentic   |          |
| 62 | oily flakes                |                          | Substituted |          |
| 63 | chips                      |                          | Diluted     |          |
| 64 | chips                      |                          | Diluted     |          |
| 65 | chips                      |                          | Diluted     |          |
| 66 | chips                      |                          | Diluted     |          |
| 67 | powder                     |                          | Authentic   |          |
| 68 | powder                     |                          | Authentic   |          |
| 69 | chips                      |                          | Substituted |          |
| 70 | chips                      |                          | Diluted     |          |
| 71 | powder                     |                          | Diluted     |          |
| 72 | powder                     |                          | Authentic   |          |
| 73 | chips                      |                          | Substituted |          |
| 74 | powder                     |                          | Authentic   |          |
| 75 | chips                      |                          | Substituted |          |
| 76 | chips                      |                          | Substituted |          |
| 77 | chips                      | Authentic                |             |          |
| 78 | chips                      | Authentic                |             |          |
| 79 | flakes                     | Not agarwood             |             | Santalum |
| 80 | flakes                     | Not agarwood             |             | Santalum |
| 81 | chips                      | Authentic                |             |          |
| 82 | chips                      | Not agarwood             |             | Santalum |
| 83 | <i>resin lumps</i>         | <i>No plant material</i> |             |          |
| 93 | wood flakes + resin chunks | Authentic                |             |          |
| 94 | oily flakes                | <i>No structure</i>      | Authentic   |          |

## NIR data

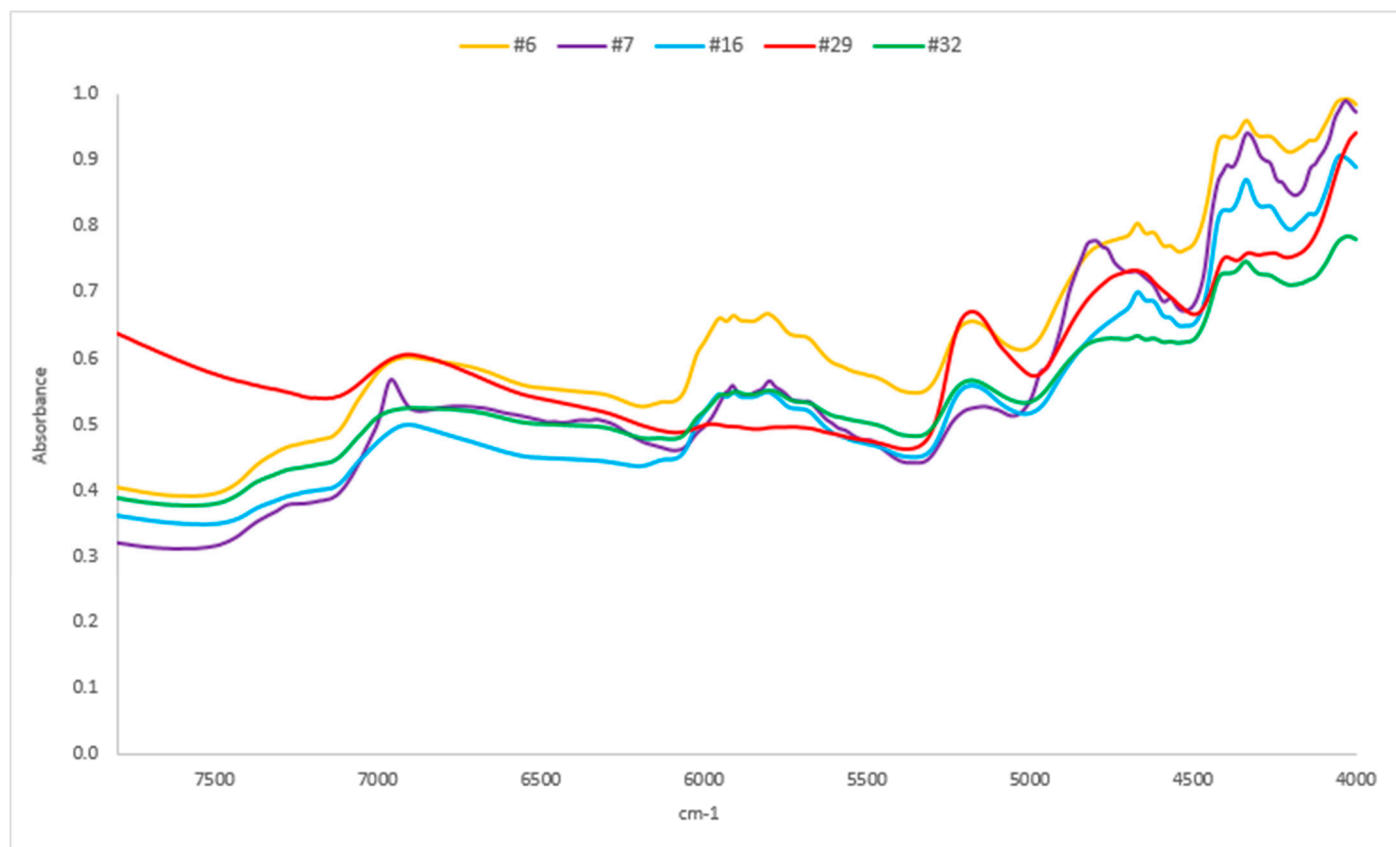

Fig. S3 Five representative NIR spectra of 'Authentic' group

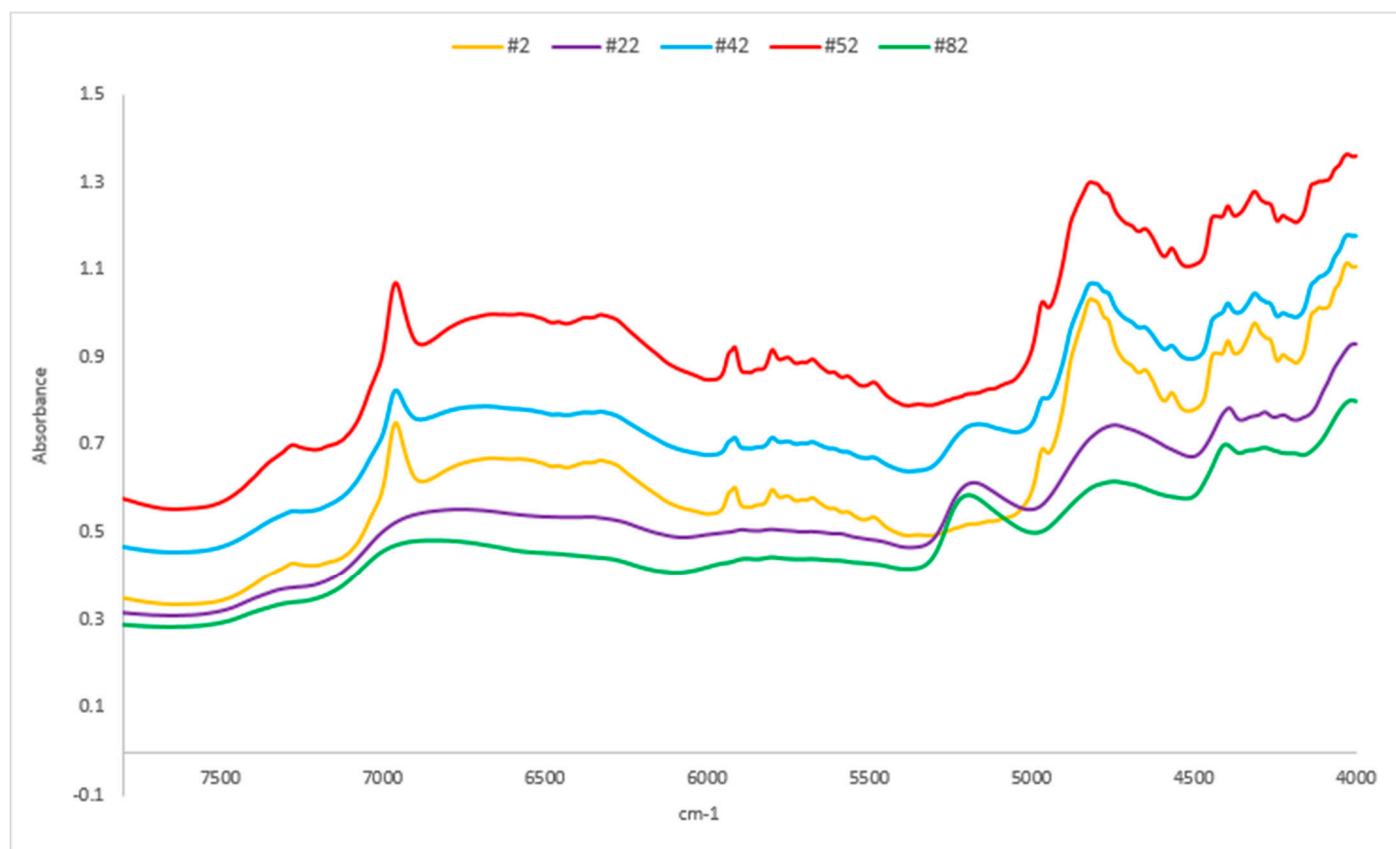

Fig. S4 Five representative NIR spectra of 'Substituted' group

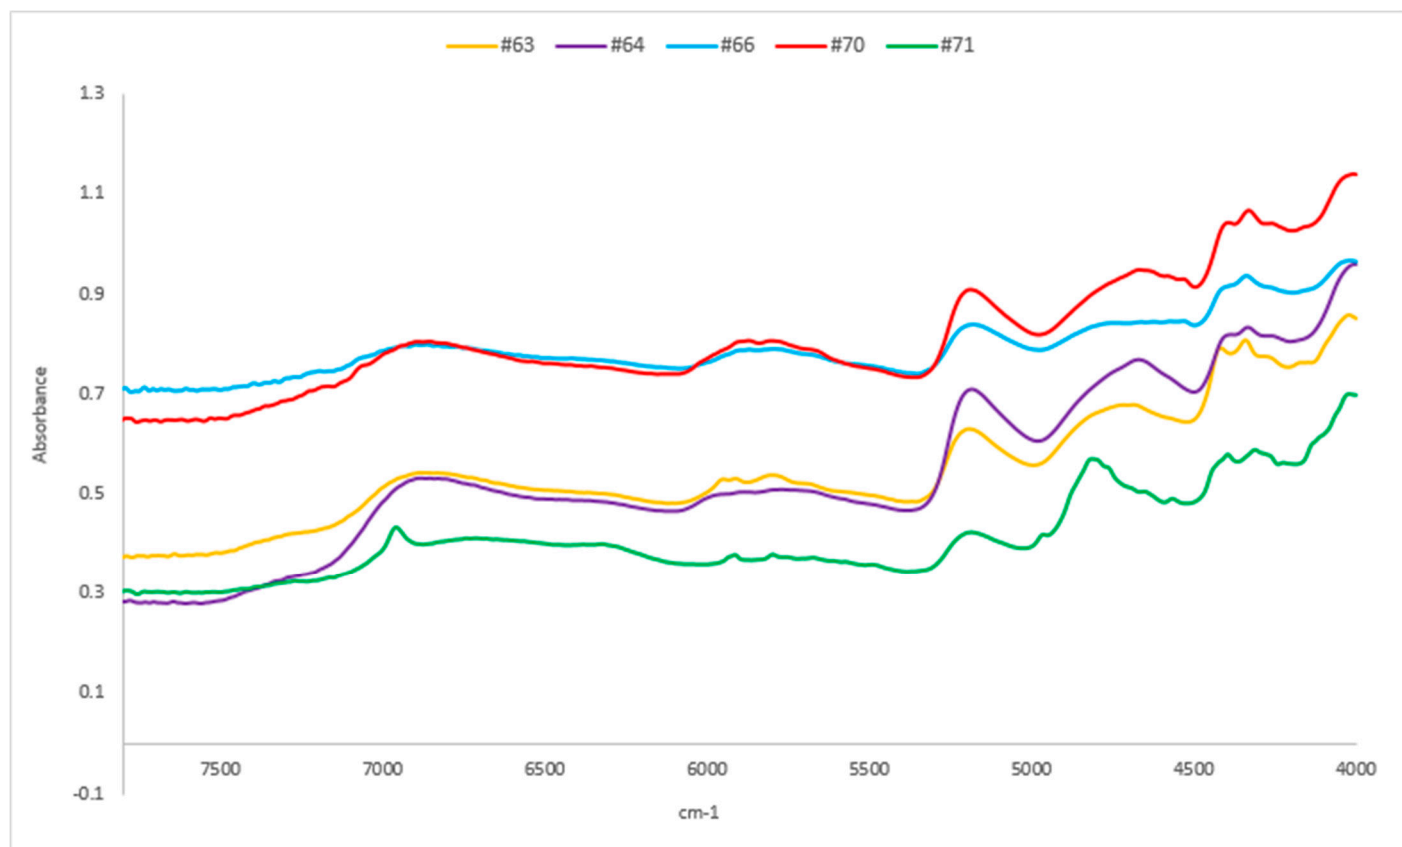

Fig. S5 Five representative NIR spectra of 'Adulterated' group

# Model

## Effect of sample washing

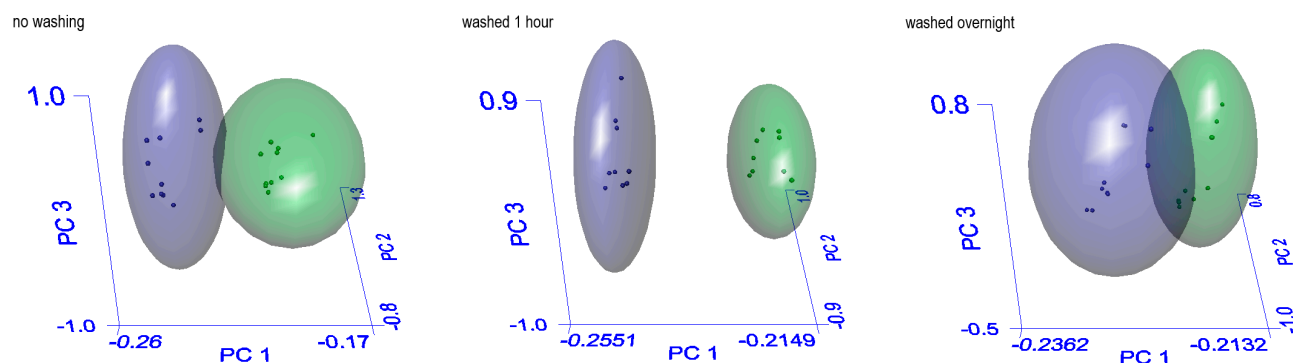

Fig. S6 Model using data from washed, unwashed, and over-washed samples. Blue = non-authentic. Green = authentic.

## Effect of baseline correction

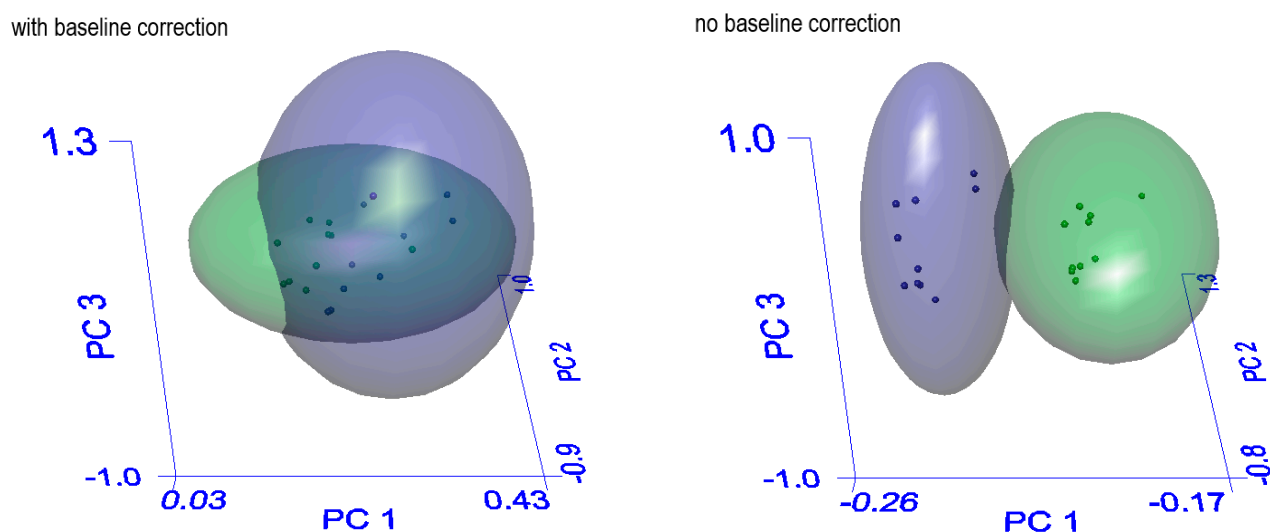

Fig. S7 Model with and without baseline correction. Blue = non-authentic. Green = authentic.

Table S2 Validation results

| Sample ID | Class         | Assignment    | Result | Material distance ratio | total | Material distance | residual |
|-----------|---------------|---------------|--------|-------------------------|-------|-------------------|----------|
| 1         | Non-authentic | Non-authentic | Passed | 0.9897                  |       | 1.4256            |          |
| 38        | Non-authentic | Non-authentic | Passed | 0.7115                  |       | 1.0249            |          |
| 44        | Non-authentic | Not assigned  | Failed | 1.0611                  |       | 1.5284            |          |
| 62        | Non-authentic | Not assigned  | Failed | 1.4327                  |       | 2.0637            |          |
| 69        | Non-authentic | Not assigned  | Failed | 1.2722                  |       | 1.8326            |          |
| 8         | Authentic     | Not assigned  | Failed | 1.5044                  |       | 2.0739            |          |
| 81        | Authentic     | Not assigned  | Failed | 1.6635                  |       | 2.2933            |          |
| 12        | Authentic     | Non-authentic | Failed | 1.3943                  |       | 1.9221            |          |
| 14        | Authentic     | Not assigned  | Failed | 1.3708                  |       | 1.8897            |          |
| 16        | Authentic     | Not assigned  | Failed | 2.2241                  |       | 3.0661            |          |
